# Supplementary material for: Long-term changes in soil biological activity and other properties of raised beds in Longan orchards
Source: PeerJ. 2024 Nov 6;12:e18396. doi: 10.7717/peerj.18396 (PMC11639206; doi:10.7717/peerj.18396)
Supplement: Supplemental Information 1 [file peerj-12-18396-s001.xlsx]

## Sheet: Sheet1
No.	Code	Yield (Ton/ha)	Raised bed ages (Year)	Longan tree age (Year)	SOIL PHYSICAL							SOIL CHEMICAL																SOIL MICROBIAL DENSITY					SOIL ENZYME ACTIVITY
					Moisture content (%)	Bulk density (g cm-3)	Particle density (g cm-3)	Soil porosity (%)	Soil texture (%)			pHw (1:2.5)	EC (µS cm-1)	Soil organic matter (%)	N total (%)	P total (%)	K total (%)	N - NH4+ (mg kg-1)	N - NO3- (mg kg-1)	Avail. P (mg kg-1)	Exchange K+ (meq 100g-1)	Exchange Ca2+ (meq 100g-1)	Avail. Si (mg kg-1)	Avail. B (mg kg-1)	Avail. Zn (mg kg-1)	Avail. Cu (mg kg-1)	Avail. Mn (mg kg-1)	Nitrogen fixing bacteria (Log10 cfu g-1)	Phosphorus solubilizing bacteria (Log10 cfu g-1)	Potassium solubilizing bacteria (Log10 cfu g-1)	Calcium solubilizing bacteria (Log10 cfu g-1)	Silicate solubilizing bacteria (Log10 cfu g-1)	B-glucosidase (µg g-1 h-1)	Urease (µg g-1 h-1)	Phosphomonoesterase (µg g-1 h-1)	Phytase (µg g-1 h-1)
									Sand	Silt	Clay
1	L1_15_15	9	15	15	31.3928	1.05667	2.41	56.1549	7.83	59.51	32.65	4.13667	538	5.72368	0.303555	0.63657	4.01209	26.2683	42.4217	667.707	0.392058	6.68	4.24242	2.04	10.6	0	43.5	5.709	4.9272	3.06213	0	0	46.2569	32.1935	478.972	7.03225
2	L2_20_20	7	20	20	26.3529	1.18	2.44	51.6393	9.9	59.44	30.66	5.95333	239.333	3.75832	0.183572	0.299173	1.75244	7.47401	32.5456	285.654	0.138488	12.3	17.1212	3.07	4.36	0	17.5	6.4258	5.23733	0	0	0	26.0996	34.17	370.12	9.02607
3	L3_20_20	18	20	20	30.36	1.04	2.44	57.377	8.96	59.76	31.28	4.59667	232	4.62032	0.25029	0.805913	3.86335	20.3896	24.8901	802.89	0.258957	1.08	12.5758	1.84	9.47	0	31.2	6.38075	4.86851	3.06213	0	0	27.2805	27.1883	470.157	8.60765
4	L4_20_20	7	20	20	27.0798	1.21667	2.48	50.9409	6.2	63.25	30.55	5.41	150.333	3.37904	0.185494	0.187084	3.66503	7.51772	18.4619	94.1452	0.125289	2.69	15.6061	2.48	5.42	0	21.9	6.21779	4.81549	3.46122	0	0	13.4889	34.0472	189.902	4.41844
5	L5_25_20	10	25	20	28.6752	1.25	2.4	47.9167	3.01	60.35	36.64	5.01	222	4.51688	0.242877	0.327236	2.1119	16.2811	16.1828	284.689	0.166559	7.2	5.75758	2.6	4.3	0	20.6	5.93423	5.24349	3.30892	0	0	51.0738	31.9669	392.199	5.4807
6	L6_30_15	30	30	15	28.2196	1.19333	2.46	51.4905	5.28	54.57	40.15	4.73333	343	4.03416	0.215696	0.436906	1.97555	18.3791	8.93642	508.384	0.467848	1.01	0	2.45	6.91	0	18.5	6.00845	4.58466	2.80275	0	0	12.4578	2.77582	171.328	7.39367
7	L7_30_30	21	30	30	27.8825	1.14667	2.45	53.1973	4.57	60.26	35.17	4.56667	439.667	3.24112	0.183846	0.314495	1.96936	27.8418	46.2786	323.473	0.623773	1.24	5.75758	1.87	6.57	0	33	5.56311	5.19083	0	0	0	4.26574	21.1533	73.0044	5.34165
8	L8_30_20	8	30	20	25.2368	1.22333	2.42	49.449	3.21	56.74	40.05	4.69	149.333	3.7928	0.168471	0.39336	1.90738	14.7513	5.37167	524.478	0.214546	0.71	20.9091	2.33	4.03	0	15.8	6.10328	4.80842	4.0547	0	0	15.7717	17.8441	203.557	6.24452
9	L9_30_30	7	30	30	27.9076	1.09	2.41	54.7718	3.8	63.68	32.52	5.16	306.667	4.9996	0.243701	0.347396	1.87639	15.101	41.4282	334.578	0.272257	8.45	50.4545	2.65	5.11	0	38.8	6.29454	5.24349	4.1542	0	0	45.7255	20.9004	466.565	5.18441
10	L10_30_25	10	30	25	25.9524	1.19	2.46	51.626	5.42	61.02	33.57	3.99333	676.667	2.91356	0.152821	0.48658	3.86335	15.8222	45.3436	839.904	0.305307	0.86	28.4848	1.97	5.53	0	31.9	5.56486	3.18419	0	0	0	3.32465	15.127	129.056	5.59455
11	L11_38_30	10	38	30	28.7515	1.19667	2.43	50.7545	5.34	60.7	33.96	4.73667	507.667	5.8616	0.296142	0.397876	1.69046	25.11	29.5068	429.528	0.346711	6.31	17.5	2.19	5.97	0	30.8	6.23067	5.17288	2.80275	0	0	57.4013	26.8906	510.572	6.0667
12	L12_40_15	12	40	15	28.8782	1.16333	2.43	52.1262	1.01	62.99	36	5.32	212.667	4.4824	0.234091	0.201599	2.1119	15.101	36.1688	123.113	0.230987	7.07	6.13636	2.01	4.26	0	15.8	5.97768	5.26413	3.12083	0	0	43.5217	23.244	260.071	4.09138
13	L13_43_15	50	43	15	23.074	1.35333	2.49	45.6493	8.02	58.85	33.13	5.83	714.333	2.34464	0.147055	0.241113	1.71525	5.94424	55.6872	277.608	0.240678	4.9	0	2.01	7.05	0	20	5.84634	3.66176	0	0	0	0	24.7108	4.13229	5.39328
14	L14_45_22	15	45	22	31.6553	1.07667	2.41	55.325	4.66	61.86	33.48	4.92333	164.333	4.72376	0.230247	0.590121	1.94457	16.0189	19.3385	798.062	0.248765	1.17	22.0455	2.41	8.87	0	35.2	6.0875	5.14019	3.69283	0	0	37.6065	19.0256	527.032	7.92107
15	L15_45_15	18	45	15	25.4843	1.27	2.45	48.1633	13.5	55.75	30.75	4.57667	347.333	3.48248	0.177806	0.58496	3.93772	24.4326	39.0907	434.356	0.266376	1.51	22.4242	1.62	5.42	0	24.8	5.44884	4.85815	2.7024	0	0	9.60142	31.2529	36.2607	6.40393
16	L16_50_30	60	50	30	28.2071	1.28	2.5	48.8	4.67	63.02	32.31	4.81667	169	3.06872	0.141564	0.428842	1.94457	21.9412	33.539	440.793	0.413011	0.71	1.59091	2.04	21	0	27.3	5.95049	5.06213	3.60774	0	0	12.0666	19.6281	104.052	5.5155
17	L17_50_15	10	50	15	22.9679	1.29333	2.46	47.4255	7.96	60.27	31.77	5.28667	189	2.62048	0.131405	0.253612	1.71525	7.82367	8.58579	193.923	0.136584	2.96	11.8182	2.06	4.62	0	27.8	5.88327	5.09206	4.2922	0	0	1.09268	21.1195	74.5367	5.46768
18	L18_53_53	10	53	53	23.7862	1.25	2.45	48.9796	1.31	51.41	47.28	4.94667	248	2.89632	0.266489	0.100396	2.05612	20.9141	29.8574	86.1791	0.156333	2.98	0	1.89	6.27	0	21.3	6.56032	3.97531	2.96179	0	0	1.61752	6.07683	66.7345	4.78067
19	L19_55_17	13	55	17	24.964	1.26667	2.43	47.8738	4.51	58.63	36.86	4.97333	194.667	2.89632	0.16298	0.21047	1.99415	18.4009	12.3259	218.063	0.145305	2.56	0	2.46	5.81	0	30.1	6.33082	5.04097	3.63226	0	0	7.52463	21.0309	164.689	4.94936
20	L20_60_15	5	60	15	22.0852	1.46	2.47	40.8907	4.12	62.01	33.87	4.63333	643	1.58608	0.0808858	0.222565	2.06232	8.78524	79.1211	195.532	0.572578	2.8	6.51515	2.18	12.7	0	45.6	5.50905	3.09739	0	0	0	0	6.28237	151.72	4.3726
